# Supplementary material
Source: PubMed Central journal article supplement (PMC4352794)
Supplement: pnas.201424400SI.pdf [file pnas.201424400SI.pdf]

# Supporting Information

Hirata et al. 10.1073/pnas.1424400112

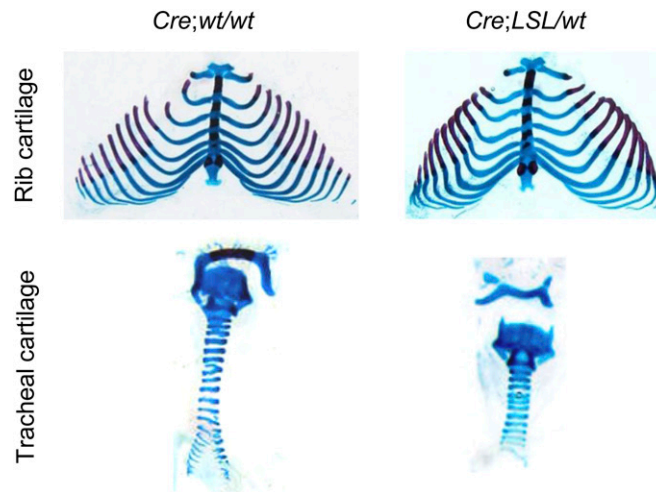

**Fig. S1.** *Col2a1-Cre;Idh1-KI* mice exhibit dysplasia of cartilage in the respiratory system. (Upper) Ribs and (Lower) tracheas are harvested from WT and *Col2a1-Cre;Idh1-KI* mutant littermates at E17.5 after whole-mount skeletal staining with alcian blue and alizarin red.

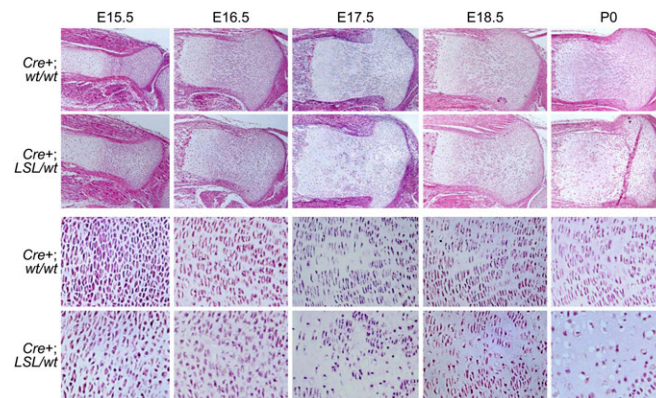

**Fig. S2.** H&E staining of proximal tibia from *Col2a1-Cre;Idh1-KI* and WT mice at perinatal stages. Disrupted columnar structures in the middle of proliferative chondrocytes are detected from E16.5 and become more evident at later stages of development.

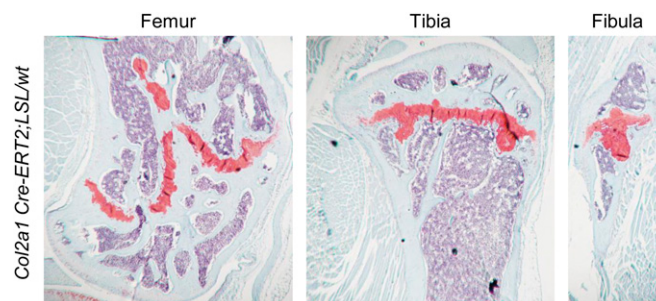

**Fig. S3.** Representative Safranin O staining of femur, tibia, and fibula harvested from *Col2a1-Cre/ERT2;Idh1-KI* mice 6 mo after injection of tamoxifen. Multiple enchondroma-like cartilage lesions were persistent in these animals.

**Table S1. Genotypes of neonates and embryos from *Col2a1*-Cre × *Idh1*<sup>LSL/wt</sup> crosses**

|                   | Embryos | Neonates | Total |
|-------------------|---------|----------|-------|
| <i>wt/wt</i>      | 7       | 17       | 24    |
| <i>LSL/wt</i>     | 5       | 15 (1*)  | 21    |
| <i>Cre;wt/wt</i>  | 8       | 12       | 20    |
| <i>Cre;LSL/wt</i> | 4       | 1 (3*)   | 8     |

\*Number of mice found dead at birth.
